# Supplementary material
Source: PubMed Central journal article supplement (PMC4279019)
Supplement: EC.00212-14_zek999094373so1.pdf [file EC.00212-14_zek999094373so1.pdf]

1 **SUPPLEMENTARY INFORMATION**

2

3

4

5

6 **The Cullin-4 complex DCDC does not require E3 ubiquitin ligase elements to control**  
7 **heterochromatin in Neurospora**

8

9

10

11

12 Keyur K. Adhvaryu, Jordan D. Gessaman, Shinji Honda, Zachary A. Lewis,

13 Paula L. Grisafi and Eric U. Selker

14

## 15 **COP9 signalosome and DNA methylation**

16 The COP9 signalosome (CSN) is believed to regulate the ubiquitin ligase activity of cullin complexes  
17 by removal of NEDD8 (1-3). Persistence of neddylation in *Neurospora* signalosome mutants (*csn*)  
18 results in autoubiquitination and degradation of the CUL1/SKP<sup>FWD1</sup> complex (4). We wished to  
19 determine if a similar persistence of NEDD8 on CUL4 in the *csn* mutants could lead to  
20 autoubiquitination and degradation of DCDC, leading to loss of DNA methylation. However, we  
21 observed normal DNA methylation in *csn* mutants (Fig. S4). Consistent with this observation,  
22 proteomic analysis of purified epitope-tagged DCDC (DIM-8-FLAG) from a *csn* mutant revealed the  
23 presence of all DCDC components (Table S1). Treatment with cycloheximide inhibits protein synthesis  
24 and affects the stability of DCDC components CUL4 and DDB1 in *csn* mutants (5). Again, we observed  
25 normal DNA methylation in cycloheximide treated *csn* mutant (Fig. S4), suggesting that DNA  
26 methylation may not require the continuous presence of DCDC at regions of DNA methylation.

27

## 28 **Histone H2A ubiquitination is not required for DNA methylation in *Neurospora***

29 Recently, it has been speculated that monoubiquitination of histone H2A lysine 119 (H2AK119ub) by  
30 CRL4B may direct DNA methylation in mammals (6). H2A monoubiquitination by BRCA-1 also  
31 mediates heterochromatin formation (7-9). To explore the possibility that H2A is a substrate for  
32 DCDC, we expressed epitope-tagged H2A (wildtype and putative ubiquitination site mutant) in  
33 wildtype and *cul4* strains but failed to detect ubiquitination in any of the transformants by Western  
34 blotting. We also developed a method to generate *in vivo* substitutions in H2A and constructed  
35 *Neurospora* strains that have all H2A with the potential ubiquitination site mutated (Supplementary  
36 Methods and Fig. S5). DNA methylation was unaffected by H2AK122A substitution (Fig. S5).  
37 Similarly, DNA methylation was not affected by mutations in *Neurospora* genes encoding proteins that  
38 are known to ubiquitinate H2A for DNA repair in mammals (10-12), namely MMS2, RAD5, RAD6,  
39 RAD18 and RNF8 (Fig. S6).

## 40 SUPPLEMENTARY METHODS

### 41 *cul4* constructs

42 We constructed plasmids to complement the *cul4* mutant with the wildtype *cul4*<sup>+</sup> gene (with its native  
43 promoter and downstream regions; plasmid pKA67) or *flag-cul4*<sup>+</sup> (pKA122; this and similar constructs  
44 include Met-FLAG-5XGly-HAT-5XGly-3XFLAG-5XGly-CUL4, abbreviated as FLAG-CUL4 for  
45 simplicity) (13). To generate the *flag-cul4*<sup>K863A</sup> construct we used pKA122 as template with primers  
46 2286 and 2287 in the PCR-based QuickChange<sup>TM</sup> Site-Directed Mutagenesis protocol (Stratagene) to  
47 generate plasmid pKA124 (*flag-cul4*<sup>K863A</sup>). PCR-driven overlap extension was used to generate  
48 pKA287 (*cul4*<sup>K863A</sup>) and pKA288 (*cul4*<sup>K863R</sup>) (14). Briefly, genomic DNA from wildtype strain (N150)  
49 was used as template in PCR reactions with the following primers: *cul4*<sup>K863A</sup> (primers 2193, 2194, 2286  
50 and 2287) and *cul4*<sup>K863R</sup> (primers 2193, 2194, 3417 and 3418). The PCR products were sequenced to  
51 confirm the presence of mutations and then cloned into the *Apa*I and *Spe*I site of pBM61 (15), to  
52 generate pKA287 and pKA288. To construct pKA294 (*flag-cul4*<sup>K863R</sup>), pKA288 (*cul4*<sup>K863R</sup>) was  
53 digested with *Not*I and *Nru*I to isolate a 581 bp fragment containing the mutation and this fragment was  
54 used to replace the corresponding region of *cul4* gene in pKA124. Plasmid pKA294 was digested with  
55 *Dra*I and plasmids pKA124, pKA287, pKA288 were digested with *Nde*I and targeted to the *his-3* locus  
56 of strain N3892 by electroporation (15). His<sup>+</sup> transformants were selected for each construct (Table  
57 S2). Primers 1664 and 2201 were used to amplify a part of the *cul4* gene from the *his-3* locus of these  
58 His<sup>+</sup> strains and the PCR products were sequenced to reconfirm the presence of desired mutations.

59 We also introduced the neddylation-site mutant alleles into a *cul4* deletion mutant. Primers  
60 2193 and 2194 were used in PCR reaction with plasmids pKA67 (13) (*cul4*<sup>+</sup>), pKA287 (*cul4*<sup>K863A</sup>) or  
61 pKA288 (*cul4*<sup>K863R</sup>) as template to amplify wildtype or mutant alleles. The gene coding for the positive  
62 selectable marker *bar* was obtained by PCR using plasmid pBARKS1 (16) as template with primers  
63 1652 and 1653. The PCR products for wildtype or neddylation-site mutant allele and *bar* were co-  
64 transformed into the *cul4* deletion mutant (N3169) by electroporation (15). Multiple Bar<sup>+</sup> transformants

65 were selected for each of the *cul4* alleles and their DNA methylation was analyzed by Southern blotting  
66 (Fig. S3).

67 To generate *flag-cul4*<sup>1-823</sup>, genomic DNA from a wildtype strain (N150) was used as template in  
68 PCR reactions with primers JGP1 and JGP3. The PCR product was then cloned into the *BglIII* and *XbaI*  
69 sites of pKA122, to generate pJG1. To generate *cul4*<sup>1-823</sup>, genomic DNA from a wildtype strain (N150)  
70 was amplified using primers JGP52 and JGP54 and the PCR product was cloned into the *Apal* and *SpeI*  
71 sites of pKA67 to generate pJG2. Plasmids pJG1 and pJG2 were digested with *NdeI* and targeted to the  
72 *his-3* locus of strain N3892 by electroporation. His<sup>+</sup> transformants were isolated for each construct and  
73 made homokaryotic through microconidiation.

74

#### 75 ***rbx1* deletion mutant**

76 To generate a knockout mutant for the putative *rbx1* gene (NCU11300), fragments corresponding to the  
77 5' UTR and 3' UTR were PCR amplified with primers JGP158/JGP159 and JGP162/JGP163  
78 respectively using genomic DNA from a wild-type strain (N150) as template. These fragments also  
79 contained homology to the *PtpC-hph* (hygromycin resistance) cassette (17). Additionally, a fragment  
80 containing *PtpC-hph* and homology to the 5' and 3' UTR regions of NCU11300 was amplified with  
81 primers JGP160 and JGP161 using plasmid *p3xFLAG::hph<sup>+</sup>::loxP* (17) as template. To generate a  
82 knockout cassette for the *rbx1* gene (*NCU11300 5' UTR-PtpC::hph<sup>+</sup>-NCU11300 3' UTR*), these three  
83 fragments were used as template in an overlap-extension PCR reaction using primers JGP158 and  
84 JGP161. This knockout cassette was transformed into strain N2930 by electroporation (15).  
85 Replacement of the native *rbx1* gene with this hygromycin resistance cassette generated Hyg<sup>R</sup>  
86 transformants that were purified by microconidiation. We were unable to obtain homokaryotic  
87 transformants, suggesting that *rbx1* gene is essential. However, we were successful in enriching the  
88 nuclei harboring the deletion using the antibiotic (hygromycin) selection of microconidia; this

89 enrichment was verified by Southern blotting using a probe corresponding to the 3' UTR region of  
90 NCU11300 (Fig. S7).

91

## 92 ***hH2A constructs***

93 The construction of epitope tagged H2A strains is briefly described here. Wildtype (N150) genomic  
94 DNA was used as template in PCR with primers 2338 and 2686 to amplify a 2.1 kb fragment  
95 containing the *hH2A* gene and 1.4 kb of 5' UTR. This PCR product was cloned into the *NotI* and *EcoRI*  
96 sites of a plasmid (pRS416+10XGly) (17) to generate plasmid pKA130. Plasmid pKA130 was digested  
97 with *NotI* + *PacI* and the 2.1 kb fragment was subcloned between the *NotI* and *PacI* sites of pCCG::C-  
98 Gly::3XFLAG (17) to obtain plasmid pKA133. In pKA133, the *hH2A* gene is separated from the  
99 3XFLAG epitope by a 10XGly spacer and the expression of H2A-FLAG is driven by the native  
100 promoter. To change the conserved ubiquitination site (K122; Fig. S5), PCR-driven overlap extension  
101 was used with primers 2271, 2272, 2338 and 2686 and plasmid pKA130 as template (14). After  
102 confirming the mutation by sequencing, the PCR product was cloned between the *NotI* and *EcoRI* sites  
103 of a plasmid (pRS416+10XGly) (17) to generate pKA137. Plasmid pKA137 was digested with *NotI*  
104 and *PacI* and the 2.1 kb fragment was subcloned between the *NotI* and *PacI* sites of pCCG::C-  
105 Gly::3XFLAG (17) to generate pKA139. Plasmid pKA133 was digested with *XmnI* and a 7.1 kb  
106 fragment containing the epitope-tagged *hH2A* gene along with the flanking *his-3* sequences was gel-  
107 purified and targeted to the *his-3* region of the host strain by electroporation. Several His<sup>+</sup>  
108 transformants were analyzed by Southern blotting (to confirm correct integration) and Western blotting  
109 (to detect H2A-FLAG) and strain N4197 was selected for further experiments. Similarly strain N4201  
110 (expressing H2A<sup>K122A</sup>-FLAG) was constructed using plasmid pKA139.

111 In order to replace the endogenous *hH2A* gene with *int<sup>+</sup>*, we constructed plasmid pKA120 as  
112 follows. Genomic DNA from wildtype strain (N150) was used as template in PCR reactions with  
113 primers 2318 and 2319 to amplify 1.4 kb of 5' UTR and primers 2320 and 2321 to amplify 1 kb of 3'

114 UTR of the *hH2A* gene. The *inl* (myoinositol-1-phosphate synthase) plasmid pOKE1 was used as  
115 template with primers 1497 and 1498 to amplify a 2.6 kb fragment containing the wildtype *inl*<sup>+</sup> gene.  
116 These three PCR products were mixed with DNA of linerized pRS416 (digested with *Bam*HI and  
117 *Eco*RI), and transformed into yeast strain PJ49-6A (18). Plasmid DNA was isolated from *ura*<sup>+</sup> colonies  
118 and transformed into *E. coli* strain *DH5αF'*. Plasmid pKA120 was isolated from a transformant,  
119 digested with *Bam*HI and *Eco*RI and the 5.1 kb fragment was purified and transformed into a *inl*, *mus*-  
120 52 strain (N2993) by electroporation (15). To confirm correct integration, 15 *Inl*<sup>+</sup> transformants were  
121 analyzed by Southern hybridization and strain N4195 was selected for further study.

122 To obtain strains expressing only H2A-FLAG, strain N4197 was crossed with N4195 and  
123 progeny growing on minimal medium were screened by Southern hybridization to obtain strains N4528  
124 and N4529. Similarly, to obtain strains expressing only H2A<sup>K122A</sup>-FLAG, strain N4201 was crossed  
125 with N4195 and progeny growing on minimal medium were screened by Southern hybridization to  
126 obtain strains N4533 and N4534.

127  
128

**TABLE S1. Mass-spectroscopic analyses of DCDC from CUL4 neddylation-site and signalosome mutants<sup>1</sup>.**

| Locus <sup>2</sup> | Description                                     | MW <sup>3</sup> | DIM-9-FLAG            | DIM-8-FLAG                   |                       |
|--------------------|-------------------------------------------------|-----------------|-----------------------|------------------------------|-----------------------|
|                    |                                                 |                 | WT                    | <i>cul4</i> <sup>K863A</sup> | <i>csn-1</i>          |
|                    |                                                 |                 | Peptides <sup>4</sup> | Peptides <sup>4</sup>        | Peptides <sup>4</sup> |
| NCU06605           | <b>DIM-8/DDB1</b>                               | 128.6           | 72                    | 216                          | 181                   |
| NCU00272           | <b>CUL4</b>                                     | 112.9           | 54                    | 160                          | 73                    |
| NCU01679           | WD40 protein                                    | 68.97           | 0                     | 74                           | 19                    |
| NCU01656           | <b>DIM-9 (WD40 protein)</b>                     | 136.7           | 70                    | 40                           | 42                    |
| NCU01290           | CBF5                                            | 52.8            | 0                     | 40                           | 0                     |
| NCU03668           | WD40 protein                                    | 88.1            | 0                     | 25                           | 5                     |
| NCU04152           | <b>DIM-7</b>                                    | 74.2            | 22                    | 19                           | 22                    |
| NCU04799           | PABP                                            | 82.3            | 0                     | 15                           | 1                     |
| NCU02151           | WD40 protein                                    | 75.9            | 0                     | 14                           | 13                    |
| NCU06598           | Fungal specific protein                         | 103.6           | 7                     | 12                           | 2                     |
| NCU08951           | H/ACA<br>ribonucleoprotein<br>complex subunit 2 | 26.8            | 0                     | 10                           | 1                     |
| NCU07735           | Grp1p                                           | 37.8            | 0                     | 6                            | 0                     |
| NCU01197           | Ssd1                                            | 148.3           | 0                     | 6                            | 0                     |
| NCU06459           | Negative regulator of<br>differentiation 1      | 85.7            | 0                     | 5                            | 0                     |
| NCU06210           | 60S ribosomal protein<br>L28e                   | 159.8           | 0                     | 3                            | 0                     |
| NCU04402           | <b>DIM-5</b>                                    | 37.5            | 1                     | 2                            | 0                     |
| NCU01634           | Histone H4                                      | 11.3            | 0                     | 2                            | 0                     |
| NCU02437           | Histone H2A                                     | 14.1            | 0                     | 2                            | 0                     |
| NCU05513           | RCC-1                                           | 65.6            | 0                     | 2                            | 0                     |
| NCU05347           | Histone H2A.Z                                   | 15.3            | 0                     | 1                            | 0                     |
| NCU03309           | NEDD-8                                          | 8.8             | 4                     | 0                            | 1                     |

129  
130  
131  
132  
133  
134  
135  
136

<sup>1</sup> DIM-8-FLAG was purified from a CUL4-neddylation site mutant (*cul4*<sup>K863A</sup>) or a COP9 signalosome mutant (*csn-1*). Purification of DIM-9-FLAG from a wildtype strain recovered all DCDC members (highlighted in red), similar to identification of DCDC with FLAG-CUL4 (13). Strains are listed in Supplementary Table 2.

<sup>2</sup> <http://www.broadinstitute.org/annotation/genome/neurospora/MultiHome.html>

<sup>3</sup> kDa

<sup>4</sup> Number of peptides.

137

138 **TABLE S2. Strains used in this study**

| Strain    | Genotype                                                                                                         | Used in Figure/Table        | Source       |            |
|-----------|------------------------------------------------------------------------------------------------------------------|-----------------------------|--------------|------------|
| N150      | 74-OR23-1 V <i>mat A</i>                                                                                         | 1C,D;2A,B,C;3A,<br>B;S2-7   | Our lab      |            |
| N623      | <i>his-3 mat A</i>                                                                                               |                             | Our lab      |            |
| N625      | <i>his-3 mat a</i>                                                                                               |                             | Our lab      |            |
| N3016     | <i>Sad-1 his-3 mat a</i>                                                                                         |                             | Our lab      |            |
| N1860     | <i>dim-2</i>                                                                                                     | S5,S6                       | Our lab      |            |
| N3892     | <i>Sad-1 his-3; cul4<sup>RIP1</sup> mat a</i>                                                                    | 1B,C,D;2A,B,C;3<br>A,B;S2-3 | (13)         |            |
| N3893     | <i>Sad-1 his-3<sup>+</sup>::cul4<sup>+</sup>; cul4<sup>RIP1</sup> mat a</i>                                      | 1D;2B,C;3A;S2               |              |            |
| N3894     | <i>Sad-1 his-3<sup>+</sup>::cul4<sup>+</sup>; cul4<sup>RIP1</sup> mat a</i>                                      | S2                          |              |            |
| N3896     | <i>Sad-1 his-3<sup>+</sup>::flag-cul4<sup>+</sup>; cul4<sup>RIP1</sup> mat a</i>                                 | 1B,C                        |              |            |
| N3898     | <i>Sad-1 his-3<sup>+</sup>::flag-cul4<sup>K863A</sup>; cul4<sup>RIP1</sup> mat a</i>                             | 1B,C                        |              |            |
| N4286     | <i>Sad-1 his-3<sup>+</sup>::flag-cul4<sup>K863R</sup>; cul4<sup>RIP1</sup> mat a</i>                             | 1B,C                        |              |            |
| N4279     | <i>Sad-1 his-3<sup>+</sup>::cul4<sup>K863A</sup>; cul4<sup>RIP1</sup> mat a</i>                                  | 1D;S2                       |              |            |
| N4280     | <i>Sad-1 his-3<sup>+</sup>::cul4<sup>K863A</sup>; cul4<sup>RIP1</sup> mat a</i>                                  | S2                          |              |            |
| N4269     | <i>Sad-1 his-3<sup>+</sup>::cul4<sup>K863R</sup>; cul4<sup>RIP1</sup> mat a</i>                                  | 1D;S2                       |              |            |
| N4270     | <i>Sad-1 his-3<sup>+</sup>::cul4<sup>K863R</sup>; cul4<sup>RIP1</sup> mat a</i>                                  | S2                          |              |            |
| N3169     | <i>cul4<sup>Δ</sup>::hph<sup>+</sup> mat a</i>                                                                   | S3                          |              | FGSC#12374 |
| N2930     | <i>his-3 mus-52<sup>Δ</sup>::bar<sup>+</sup>; mat A</i>                                                          |                             |              | Our lab    |
| N2993     | <i>his-3 mus-52<sup>Δ</sup>::bar<sup>+</sup>; inl<sup>Δ</sup> mat A</i>                                          |                             |              | Our lab    |
| N4195     | <i>his-3 mus-52<sup>Δ</sup>::bar<sup>+</sup>; inl<sup>Δ</sup>; hH2A<sup>Δ</sup>::inl<sup>+</sup> mat A</i>       |                             | This study   |            |
| N4197     | <i>his-3<sup>+</sup>::hH2A-FLAG; Sad-2<sup>Δ</sup>::hph<sup>+</sup> inl<sup>Δ</sup> mat a</i>                    |                             | This study   |            |
| N4201     | <i>his-3<sup>+</sup>::hH2A<sup>K122A</sup>-FLAG; Sad-2<sup>Δ</sup>::hph<sup>+</sup> inl<sup>Δ</sup> mat a</i>    |                             | This study   |            |
| N4528     | <i>his-3<sup>+</sup>::hH2A-FLAG; hH2A<sup>Δ</sup>::inl<sup>+</sup></i>                                           | S5                          | This study   |            |
| N4529     | <i>his-3<sup>+</sup>::hH2A-FLAG; hH2A<sup>Δ</sup>::inl<sup>+</sup></i>                                           | S5                          | This study   |            |
| N4533     | <i>his-3<sup>+</sup>::hH2A<sup>K122A</sup>-FLAG; hH2A<sup>Δ</sup>::inl<sup>+</sup></i>                           | S5                          | This study   |            |
| N4534     | <i>his-3<sup>+</sup>::hH2A<sup>K122A</sup>-FLAG; hH2A<sup>Δ</sup>::inl<sup>+</sup></i>                           | S5                          | This study   |            |
| N5112     | <i>csn-1<sup>Δ</sup>::hph<sup>+</sup></i>                                                                        | S4                          | FGSC#11281   |            |
| N5113     | <i>csn-1<sup>Δ</sup>::hph<sup>+</sup></i>                                                                        | S4                          | FGSC#11282   |            |
| N5029     | <i>his-3<sup>+</sup>::cul4<sup>K863A</sup>; cul4<sup>RIP1</sup>;<br/>dim-8-flag::loxP::hph<sup>+</sup>::loxP</i> | Table S1                    | This study   |            |
| N3970     | <i>dim-9-flag::loxP::hph<sup>+</sup>::loxP</i>                                                                   | Table S1                    | This study   |            |
| N5030     | <i>csn-1<sup>Δ</sup>::hph<sup>+</sup>; dim-8-flag::loxP::hph<sup>+</sup>::loxP</i>                               | Table S1                    | This study   |            |
| N5292     | <i>Sad-1 his-3<sup>+</sup>::flag-cul4<sup>1-823</sup>; cul4<sup>RIP1</sup> mat a</i>                             |                             | This study   |            |
| N5299     | <i>Sad-1 his-3<sup>+</sup>::cul4<sup>1-823</sup>; cul4<sup>RIP1</sup> mat a</i>                                  | 2B,C,D                      | This study   |            |
| N4616     | <i>mms2<sup>Δ</sup>::hph<sup>+</sup></i>                                                                         | S6                          | This study   |            |
| FGSC15992 | <i>rnf8<sup>Δ</sup>::hph<sup>+</sup><br/>mus-41, rad-5b,-c</i>                                                   | S6<br>S6                    | FGSC<br>(19) |            |
| FSSC11445 | <i>uvs-2<sup>Δ</sup>::hph<sup>+</sup></i>                                                                        | S6                          | FGSC         |            |
| FGSC15992 | <i>upr-1<sup>Δ</sup>::hph<sup>+</sup></i>                                                                        | S6                          | FGSC         |            |
| N5523     | <i>rbx1<sup>Δ</sup>::hph<sup>+</sup> his-3 mus-52<sup>Δ</sup>::bar<sup>+</sup>; mat A</i>                        | 3A,B;S7                     | This study   |            |



140 **TABLE S3. Primers used in this study.**

| Primer | Sequence                                                |
|--------|---------------------------------------------------------|
| 1652   | CCGTCGACAGAAGATGATATTGAAGGAGC                           |
| 1653   | AATTAACCCCTCACTAAAGGGAACAAAAGC                          |
| 1654   | AGCTGACATCGACACCAACG                                    |
| 1664   | ATTCAGACCCCATTAGCCGTCCACGCC                             |
| 2193   | CGCTTAAGAGCGCTGACATAGCGATGATGCTT                        |
| 2194   | GCTCTAGAGCCATTCGTTAGAATCACAATACA                        |
| 2201   | GCGCGTCCTCAACAAACACCC                                   |
| 2286   | GTGCGCATCATGGCCAGCCGGAAGAAG                             |
| 2287   | CTTCTTCCGGCTGGCCATGATGCGCAC                             |
| 3417   | GTGCGCATCATGCGCAGCCGGAAGAAG                             |
| 3418   | CTTCTTCCGGCTGCGCATGATGCGCAC                             |
| 2338   | ATAAGAATGCGGCCGCGCCTGATCGCTGATGGGA                      |
| 2686   | CGGAATTCAAGTTCTTGA CTGCGTT                              |
| 2271   | CTCCTTCCTAAGGCCACCGGCAAGACT                             |
| 2272   | AGTCTTGCCGGTGGCCTTAGGAAGGAG                             |
| 2318   | GTAACGCCAGGGTTTTCCCAGTCACGACGGGATCCGCCTGATCGCTGATGGGA   |
| 2319   | GTGGATGCACGTCTGCCCTGGAGATTGTTGGAGCTCTAAGACTCGGAAGTCGCG  |
| 2320   | TGGTGGTTGTTGACCGTGATACAACTCCTAGCTAGCCTGTATAAAGTAACGATA  |
| 2321   | TGAGCGGATAACAATTTACACAGGAAACAGCGAATTCGTACCTAGTGGAGTGAAC |
| 1497   | GCCGAGCTCCAACAATCTCCAGGGCAGACG                          |
| 1498   | GCCGCTAGCTAGGAGTTTGTATCACGGTCA                          |
| 2852   | GTAACGCCAGGGTTTTCCCAGTCACGACGAAAGGTCAGGGGGCGTTGA        |
| 2853   | ACCGGGATCCACTTAACGTTACTGAAATCTGTTTCTTAGTACTTTTG         |
| 2854   | GCTCCTTCAATATCATCTTCTGTGACGGACATCTACCGGTACCGGA          |
| 2855   | GCGGATAACAATTTACACAGGAAACAGCGCTTCATTGCTTCATTGC          |
| hph-FP | CCGTCGACAGAAGATGATATTGAAGGAGC                           |
| hph-RP | AGCTGACATCGACACCAACG                                    |
| JGP1   | CGATGCGAGATCTATGGCCACGGGCAAAACACCA                      |
| JGP3   | CGATGCGTCTAGAGA ACTTGGGATCGGTGAAGGA                     |
| JGP52  | CGATGCGACTAGTAAACGGCCCGCCAGTGTGCTGGA                    |
| JGP54  | CGATGCGGGGCCCTAGAACTTGGGATCGGTGAA                       |
| JGP158 | AGCAAGGCGGCGATAAGGGGT                                   |
| JGP159 | TTCTGTCGACTTCAACTGTCTTTTTGAATCTCTCGTTTCG                |
| JGP160 | GACAGTTGAAGTCGACAGAAGATGATATTGAAGG                      |
| JGP161 | TACCGCGGA ACTACTCTATTCTTTGCCCTCGG                       |
| JGP162 | AATAGAGTAGTTCGCGGTACTTGCTAGGG                           |
| JGP163 | GTGGGTCTAGAAAGGGA ACTAGCT                               |

141

142

143

144

Adhvaryu\_et.\_al.\_Fig. S1

145

|     |                        |          |     |                      |     |
|-----|------------------------|----------|-----|----------------------|-----|
| 146 | <i>N. crassa</i>       | CUL4     | 854 | TQAAIVRIMKSRKKMAHAQL | 873 |
| 147 | <i>S. pombe</i>        | Pcu4     | 671 | LQASIVRVMKQKEKMKHDDL | 690 |
| 148 | <i>C. elegans</i>      | Cullin 4 | 777 | IDAAVVRIMKARKQLNHQTL | 896 |
| 149 | <i>D. melanogaster</i> | Cullin 4 | 758 | IDAAIVRIMKMRKTLSHNLL | 777 |
| 150 | <i>A. thaliana</i>     | Cullin 4 | 679 | IDAAIVRIMKTRKVLSHPLL | 698 |
| 151 | <i>H. sapiens</i>      | CUL-4A   | 696 | IDAAIVRIMKMRKTLGHNLL | 715 |
| 152 | <i>H. sapiens</i>      | CUL-4B   | 749 | IDAAIVRIMKMRKTLSHNLL | 768 |

153

154 **Fig. S1. NEDD8 attachment site is conserved in CUL4.** Alignment of a conserved region in the  
 155 carboxy termini of Cullin 4 proteins from various eukaryotes including *Neurospora crassa* (13),  
 156 *Schizosaccharomyces pombe* (BAA32520, accession number at NCBI), *Caenorhabditis elegans*  
 157 (AAA68791), *Drosophila melanogaster* (NP\_001163084), *Arabidopsis thaliana* (CAC85265) and  
 158 *Homo sapiens* (CUL-4A: Q13619 and CUL-4B: Q13620). Identical residues are colored blue, NEDD8  
 159 is attached to the lysine that is indicated in red.

160

161

162

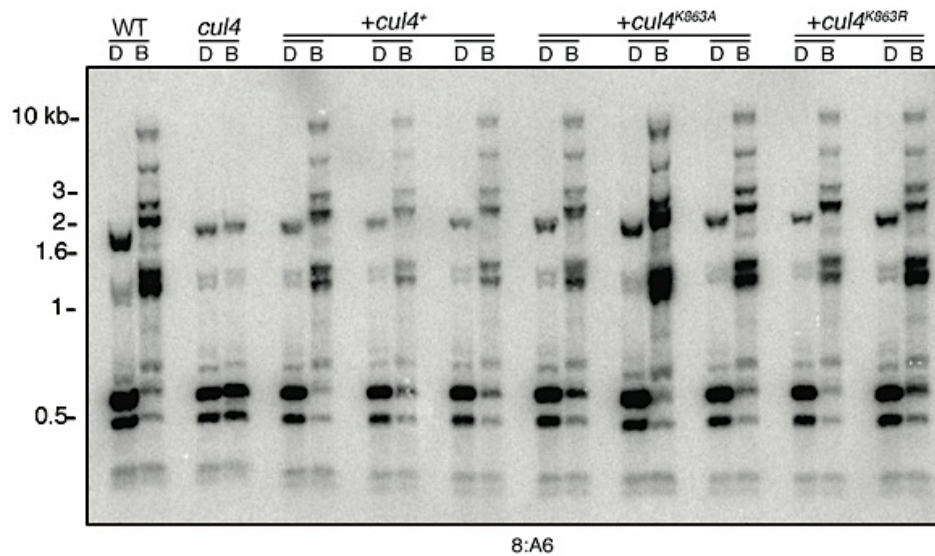

163

164

165 **Fig. S2. DNA methylation analysis of wildtype (WT), *cul4* and transformed *cul4* strains**  
166 **expressing the indicated untagged CUL4 constructs.** DNA was digested with 5mC-sensitive *BfuCI*  
167 (B) or its 5mC-insensitive isoschizomer *DpnII* (D) and the Southern blot was probed for methylated  
168 region 8:A6 (20); kb size standards (left). Equivalent results were obtained for other methylated regions  
169 (5:B8). Strains are listed in Table S2.

170

171

172

173

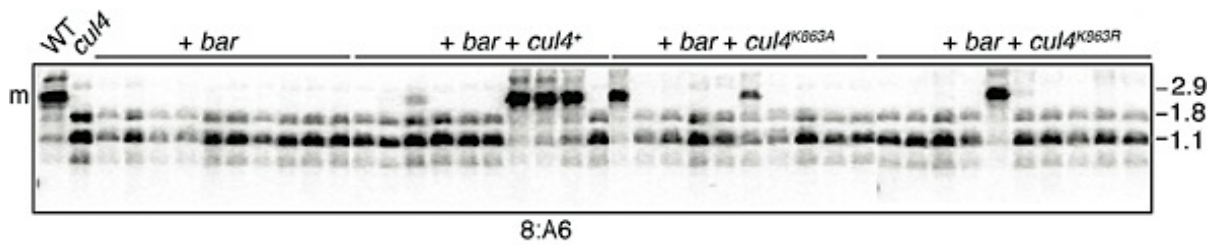

174

175

176 **Fig. S3. *cul4* neddylation-site mutant alleles complement DNA methylation in a *cul4* deletion**

177 **mutant.** A *cul4* deletion mutant (N3169) was transformed by electroporation (15) with a PCR product

178 encoding basta resistance (*bar*) or co-transformed with PCR products encoding basta resistance (*bar*)

179 and wildtype (*cul4*<sup>+</sup>) or neddylation-site mutant (*cul4*<sup>K863A/R</sup>) alleles (Supplementary Methods). DNA

180 from multiple Bar<sup>+</sup> transformants were digested with 5mC-sensitive *Ava*II and the Southern blot was

181 probed for methylated region 8:A6 (20). Methylation of *Ava*II site prevents digestion in wildtype strain

182 (2.9 kb band labeled 'm'), while lack of DNA methylation in *cul4* mutant permits digestion by *Ava*II

183 resulting in two fragments (1.8 and 1.1 kb). Transformation with either wildtype (*cul4*<sup>+</sup>) or

184 neddylation-site mutant alleles (*cul4*<sup>K863A/R</sup>) resulted in complementation.

185

186

187

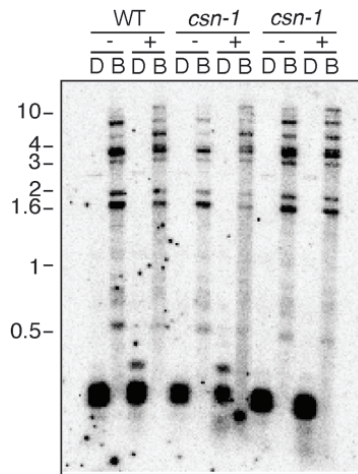

188

189

190

191 **Fig. S4. COP9 Signalosome (CSN) is not required for DNA methylation.** Normal DNA methylation  
192 in *csn-1* mutant. DNA from wildtype strain (N150) or two *csn-1* strains was digested with *Bfu*CI (B) or  
193 *Dpn*II (D) and the Southern blot was probed for methylated region 8:A6 (20); kb size standards (left).  
194 Cultures were grown in absence (-) or presence of 10  $\mu$ g/ml cycloheximide (+). Strains are listed in  
195 Table S2.

196

197



213  
214  
215

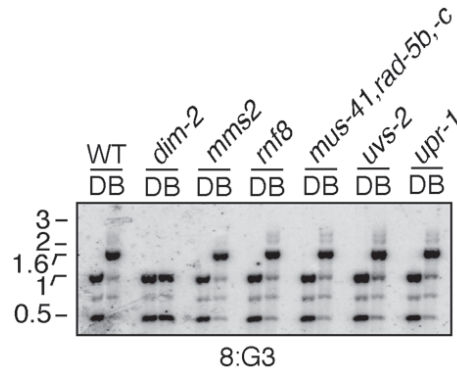

216

217

218 **Fig. S6. DNA methylation is normal in various DNA repair mutants.** DNA was digested with  
219 *BfuCI* (B) or *DpnII* (D) and the Southern blot was probed for methylated region 8:G3 (20); kb size  
220 standards (left). Strains are listed in Table S2.

221

222

223

224

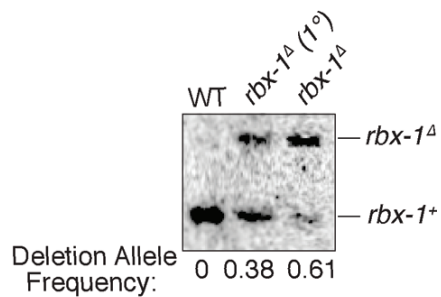

225

226

227 **Fig. S7. Generation of *rbx1* deletion mutant.** The endogenous allele was replaced with a hygromycin  
228 resistance selection cassette (Supplementary Methods) and the primary transformant (1 $^{\circ}$ ) was purified  
229 by microconidiation. The fraction of nuclei bearing the deletion was assessed by comparing the relative  
230 intensity of bands for the deletion and endogenous allele. The *rbx1* gene appears to be essential and we  
231 were unable to obtain a homokaryon. Strains are listed in Table S2.

232

233



234 **REFERENCES**

- 235 1. **Wu J-T, Chan Y-R, Chien C-T.** 2006. Protection of cullin–RING E3 ligases by CSN–UBP12.  
236 Trends Cell Biol **16**:362-369.
- 237 2. **Hotton SK, Callis J.** 2008. Regulation of cullin RING ligases. Annu Rev Plant Biol **59**:467-489.
- 238 3. **Choo YY, Boh BK, Lou JJ, Eng J, Leck YC, Anders B, Smith PG, Hagen T.** 2011.  
239 Characterization of the role of COP9 signalosome in regulating cullin E3 ubiquitin ligase activity.  
240 Mol Biol Cell **22**:4706-4715.
- 241 4. **He Q.** 2005. The COP9 signalosome regulates the Neurospora circadian clock by controlling the  
242 stability of the SCFFWD-1 complex. Genes Dev **19**:1518-1531.
- 243 5. **Wang J, Hu Q, Chen H, Zhou Z, Li W, Wang Y, Li S, He Q.** 2010. Role of Individual Subunits  
244 of the Neurospora crassa CSN Complex in Regulation of Deneddylation and Stability of Cullin  
245 Proteins. PLoS Genet **6**:e1001232.
- 246 6. **Yang Y, Liu R, Qiu R, Zheng Y, Huang W, Hu H, Ji Q, He H, Shang Y, Gong Y, Wang Y.**  
247 2013. CRL4B promotes tumorigenesis by coordinating with SUV39H1/HP1/DNMT3A in DNA  
248 methylation-based epigenetic silencing. Oncogene **2013**:1-15.
- 249 7. **Zhu Q, Pao GM, Huynh AM, Suh H, Tonnu N, Nederlof PM, Gage FH, Verma IM.** 2011.  
250 BRCA1 tumour suppression occurs via heterochromatin-mediated silencing. Nature **477**:179-184.
- 251 8. **Kapetanaki MG, Guerrero-Santoro J, Bisi DC, Hsieh CL, Ropic-Otrin V, Levine AS.** 2006.  
252 The DDB1-CUL4ADDB2 ubiquitin ligase is deficient in xeroderma pigmentosum group E and  
253 targets histone H2A at UV-damaged DNA sites. Proc Natl Acad Sci U S A **103**:2588-2593.
- 254 9. **Guerrero-Santoro J, Kapetanaki MG, Hsieh CL, Gorbachinsky I, Levine AS, Ropic-Otrin V.**  
255 2008. The cullin 4B-based UV-damaged DNA-binding protein ligase binds to UV-damaged  
256 chromatin and ubiquitinates histone H2A. Cancer Res **68**:5014-5022.
- 257 10. **Inoue H.** 2011. Exploring the processes of DNA repair and homologous integration in Neurospora.  
258 Mutation research **728**:1-11.

- 259 11. **Ulrich HD, Walden H.** 2010. Ubiquitin signalling in DNA replication and repair. *Nat Rev Mol*  
260 *Cell Biol* **11**:479-489.
- 261 12. **Zhou W, Wang X, Rosenfeld MG.** 2009. Histone H2A ubiquitination in transcriptional regulation  
262 and DNA damage repair. *Int J Biochem Cell Biol* **41**:12-15.
- 263 13. **Lewis ZA, Adhvaryu KK, Honda S, Shiver AL, Knip M, Sack R, Selker EU.** 2010. DNA  
264 methylation and normal chromosome behavior in *Neurospora* depend on five components of a  
265 histone methyltransferase complex, DCDC. *PLoS Genet* **6**:e1001196.
- 266 14. **Heckman KL, Pease LR.** 2007. Gene splicing and mutagenesis by PCR-driven overlap extension.  
267 *Nat Protoc* **2**:924-932.
- 268 15. **Margolin BS, Freitag M, Selker EU.** 1997. Improved plasmids for gene targeting at the *his-3*  
269 locus of *Neurospora crassa* by electroporation. *Fungal Genet Newsl* **44**:34-36.
- 270 16. **Pall MLaB, J. P.** 1993. A series of six compact fungal transformation vectors containing  
271 polylinkers with multiple unique restriction sites. *Fungal Genet Newsl* **40**:59-62.
- 272 17. **Honda S, Selker EU.** 2009. Tools for fungal proteomics: multifunctional *neurospora* vectors for  
273 gene replacement, protein expression and protein purification. *Genetics* **182**:11-23.
- 274 18. **James P, Halladay J, Craig EA.** 1996. Genomic libraries and a host strain designed for highly  
275 efficient two-hybrid selection in yeast. *Genetics* **144**:1425-1436.
- 276 19. **Kawabata T, Kato A, Suzuki K, Inoue H.** 2007. *Neurospora crassa* RAD5 homologue, *mus-41*,  
277 inactivation results in higher sensitivity to mutagens but has little effect on PCNA-ubiquitylation in  
278 response to UV-irradiation. *Current genetics* **52**:125-135.
- 279 20. **Selker EU, Tountas NA, Cross SH, Margolin BS, Murphy JG, Bird AP, Freitag M.** 2003. The  
280 methylated component of the *Neurospora crassa* genome. *Nature* **422**:893-897.
- 281 21. **Hays SM, Swanson J, Selker EU.** 2002. Identification and characterization of the genes encoding  
282 the core histones and histone variants of *Neurospora crassa*. *Genetics* **160**:961-973.

283 22. **Kouzminova E, Selker EU.** 2001. dim-2 encodes a DNA methyltransferase responsible for all  
284 known cytosine methylation in Neurospora. EMBO J **20**:4309-4323.

285
